# Supplementary material
Source: publisher figshare collection journal article supplement (https://karger.figshare.com/ndownloader/files/15630290)
Supplement: Supplementary file 1 [file 15630290]

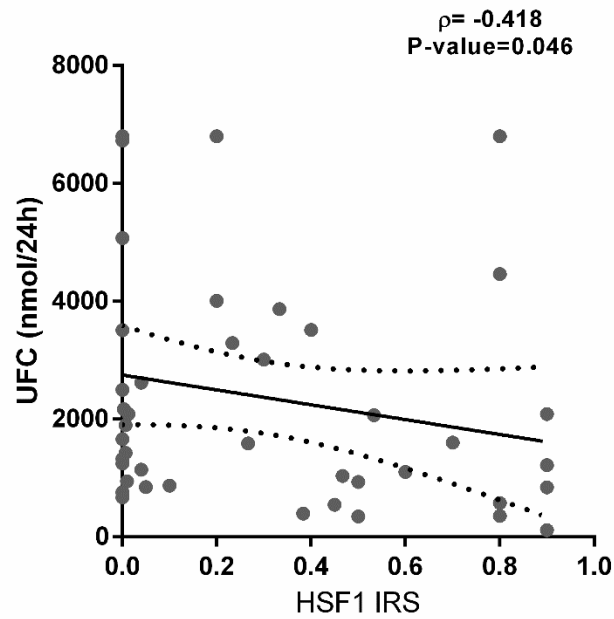

**Supplementary Figure 1: Correlation between urinary free cortisol (UFC) and HSF1 immunoreactivity score (IRS).** UFC concentrations and HSF1 IRS in 45 patients with Cushing's disease.
